# Supplementary material
Source: PubMed Central journal article supplement (PMC4025568)
Supplement: Supp_Fig1.pdf [file Supp_Fig1.pdf]

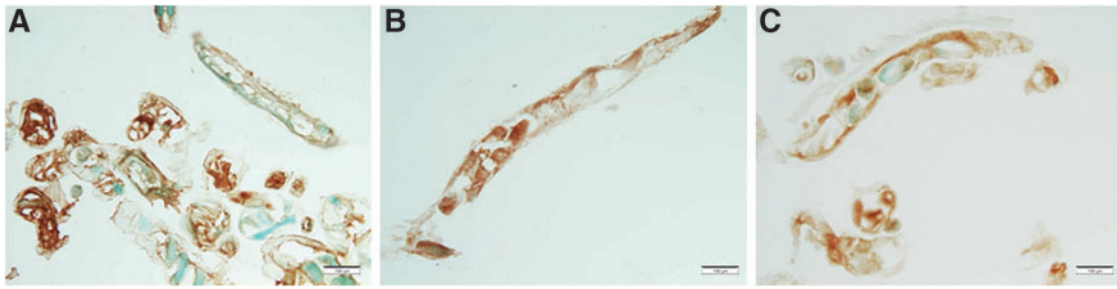

**SUPPLEMENTARY FIG. S1. Identification of hydrogen sulfide (H<sub>2</sub>S)-synthesizing enzymes in *C. elegans*.** Transverse sections of *C. elegans* showing diaminobenzidine staining for cystathionine  $\gamma$  lyase (CSE) (A), cystathionine  $\beta$  synthetase (CBS) (B), and 3-mercaptopyruvate transferase (3-MST) (C). Magnification is  $\times 40$ . Horizontal bar shows scale (100  $\mu$ m).
