# Supplementary material
Source: PubMed Central journal article supplement (PMC4025568)
Supplement: Supp_Fig2.pdf [file Supp_Fig2.pdf]

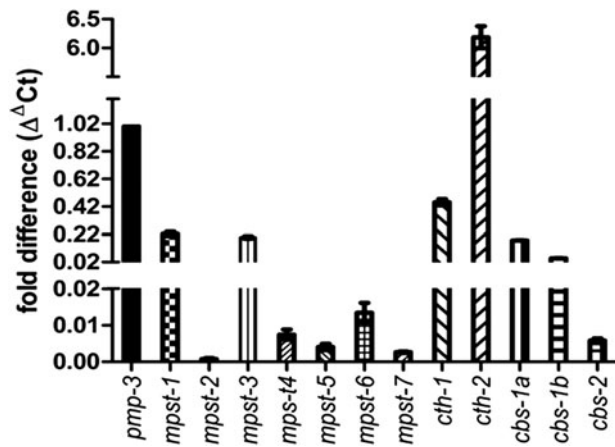

SUPPLEMENTARY FIG. S2. Expression of genes for H<sub>2</sub>S-synthesizing enzymes in *C. elegans*. Quantitative polymerase chain reaction (qPCR) quantitation of genes encoding for known orthologues of 3-MST (*mpst1-7*), CSE (*cth-1* and *cth-2*), and CBS (*cbs-1a*, *cbs-1b*, and *cbs-2*) in wild-type *C. elegans*. Data show fold expression of each gene relative to a housekeeping gene, *pmp3*, after normalization against the housekeeping gene control, *ama-1*, and are mean  $\pm$  SE of four separate experiments using at least 5000 animals per experiment.
