# Supplementary material
Source: PubMed Central journal article supplement (PMC4025568)
Supplement: Supp_Fig3.pdf [file Supp_Fig3.pdf]

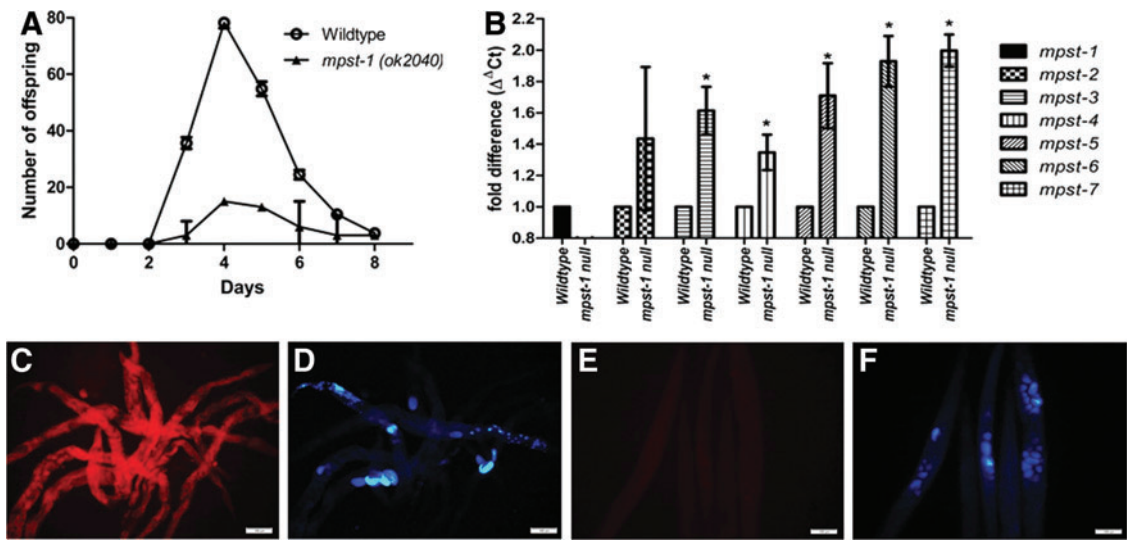

**SUPPLEMENTARY FIG. S3. Characterization of *mpst-1* knockout animals.** (A) Brood size determined over a period of 8 days (after L1) of wild-type and *mpst-1* knockout *C. elegans*. Results show mean  $\pm$  SE. (B) qPCR quantitation of genes encoding for 3-MST (*mpst1-7*) in *mpst-1* knockout animals. Data show expression of each gene relative to control, that is, N2/wild-type expression (100%) and are mean  $\pm$  SE of four separate experiments using at least 5000 animals per experiment, \* $p < 0.05$ . (C) Transverse sections of *C. elegans* showing immunoreactive staining for 3-MST (C, E) and corresponding 4',6-diamidino-2-phenylindole-stained nuclei (D, F) in wild-type (C, D) and *mpst-1* knockout (E, F) animals. Magnification is  $\times 20$ . Horizontal bar shows scale (100  $\mu$ m).
