# Supplementary material
Source: PubMed Central journal article supplement (PMC4025568)
Supplement: Supp_Fig4.pdf [file Supp_Fig4.pdf]

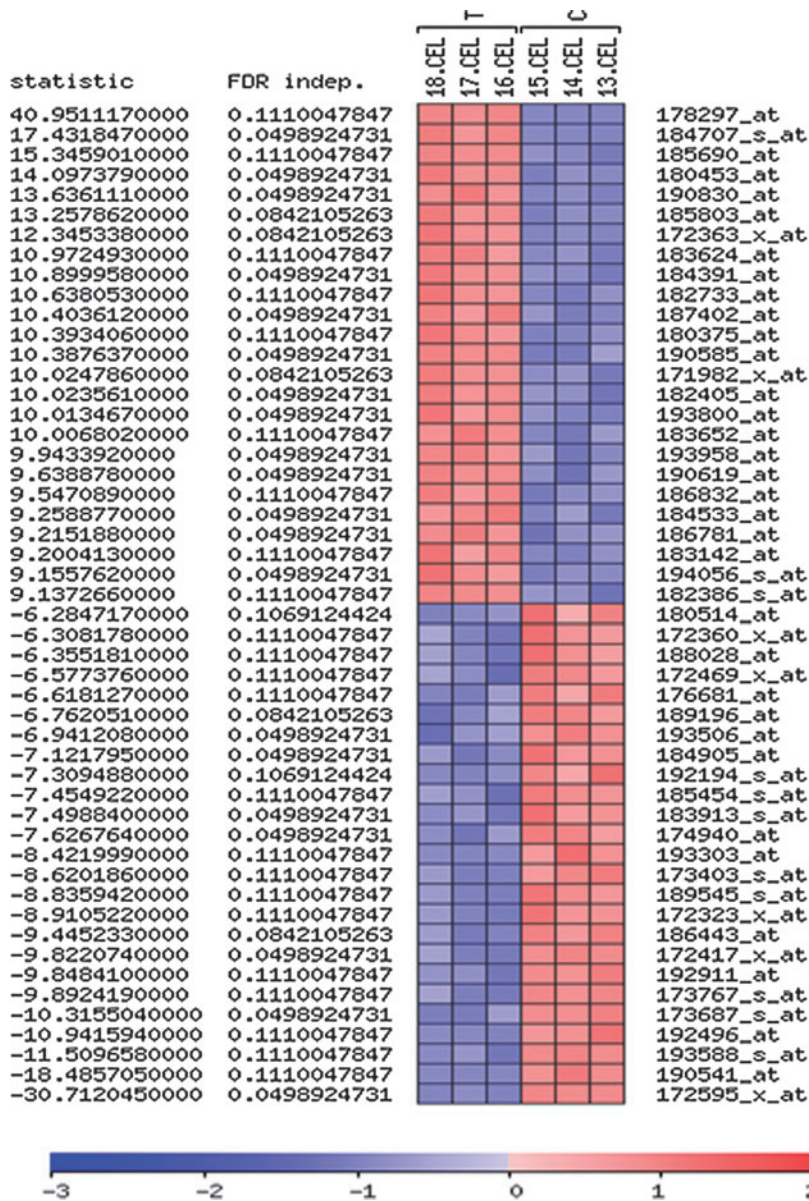

SUPPLEMENTARY FIG. S4. Microarray analysis of the effect of GYY4137 on *C. elegans*. Summary of the effect of GYY4137 (100  $\mu$ M) treatment on genome-wide transcription in *C. elegans* as determined by microarray analysis. Top 25 most upregulated and most downregulated genes are shown for three replicates in each group. T=treatment with GYY4137 and C=treatment with vehicle control. Color intensity indicates relative expression levels in the array.
