# Supplementary material
Source: PubMed Central journal article supplement (PMC4025568)
Supplement: Supp_Fig5.pdf [file Supp_Fig5.pdf]

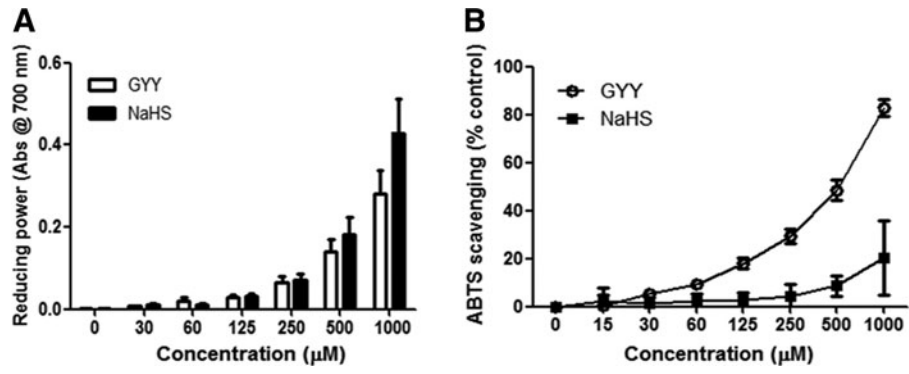

SUPPLEMENTARY FIG. S5. GYY4137 and markers of oxidative stress in *C. elegans*. Comparison of the antioxidant effect of GYY4137 and NaHS in aqueous solution using the reducing power (A) and ABTS (B) assays *in vitro*. Data show mean  $\pm$  SEM,  $n=8$ .
