# Supplementary material
Source: PubMed Central journal article supplement (PMC4025568)
Supplement: Supp_Fig6.pdf [file Supp_Fig6.pdf]

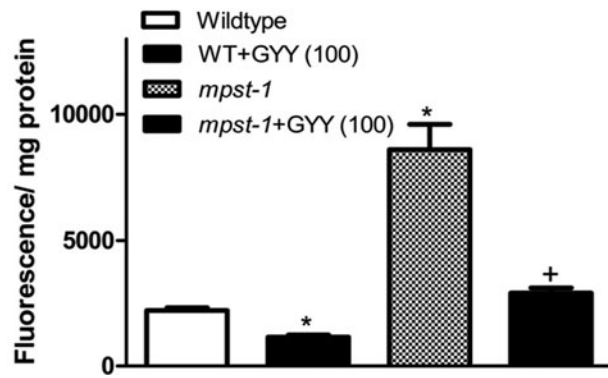

**SUPPLEMENTARY FIG. S6. Measurement of oxidative stress in *C. elegans*.** Relative H<sub>2</sub>O<sub>2</sub> levels were determined using the 2,7-dichlorofluorescein diacetate fluorescence assay in intact wild-type controls and *mpst-1* siRNA knockdowns in the presence or absence of GYY4137 (GYY; 100  $\mu$ M). Data show the mean of four observations from three independent experiments, where \* is significant ( $p < 0.05$ ) compared to wildtype and + is significant ( $p < 0.05$ ) to the *mpst-1* knockout.
