# Supplementary material
Source: PubMed Central journal article supplement (PMC4025568)
Supplement: Supp_Table1.pdf [file Supp_Table1.pdf]

## Supplementary Data

### Supplementary Methods

#### Supplementary results

SUPPLEMENTARY TABLE S1. DIFFERENTIALLY EXPRESSED AGING-RELATED GENES

| <i>Gene symbol</i> | <i>Change</i> | <i>Gene title</i>                                 |
|--------------------|---------------|---------------------------------------------------|
| <i>dod-21</i>      | 8.7           | C32H11.9/Downstream Of DAF-16                     |
| <i>dod-22</i>      | 4.6           | Downstream Of DAF-16                              |
| <i>ins-7</i>       | 2.4           | INSulin related                                   |
| <i>dod-24</i>      | 1.9           | Downstream Of DAF-16                              |
| <i>dod-23</i>      | 1.8           | Downstream Of DAF-16                              |
| <i>dod-17</i>      | 1.6           | Downstream Of DAF-16                              |
| <i>gei-7</i>       | 1.6           | GEX Interacting protein                           |
| <i>dod-19</i>      | 1.5           | Downstream Of DAF-16                              |
| <i>dod-6</i>       | 1.4           | Downstream Of DAF-16                              |
| <i>catalase</i>    | 1.4           | Y54G11A.13/Y54G11A.6/catalase                     |
| <i>fkf-3</i>       | 1.4           | FK506-Binding protein family/FKBP-binding protein |
| <i>ftn-1</i>       | 1.4           | FerriTiN/ferritin heavy chain                     |
| <i>akt-1</i>       | -1.9          | AKT kinase family                                 |
| <i>let-363</i>     | -1.8          | LEThal                                            |
| <i>tag-335</i>     | -1.7          | C42C1.5/guanylyltransferase                       |
| <i>daf-18</i>      | -1.7          | abnormal DAuer Formation                          |
| <i>pat-3</i>       | -1.4          | Paralysed Arrest at Two-fold//beta integrin       |
| <i>ugt-1</i>       | -1.4          | AC3.7/UDP-glucuronosyltransferase                 |

Microarray data showing significantly ( $p < 0.05$ ) changed genes in gene ontology (GO) class representing response to aging from GYY4137-exposed (100  $\mu$ M) *Caenorhabditis elegans*.
