# Supplementary material
Source: PubMed Central journal article supplement (PMC4025568)
Supplement: Supp_Table2.pdf [file Supp_Table2.pdf]

SUPPLEMENTARY TABLE S2. DIFFERENTIALLY EXPRESSED GENES WITH RESPONSE TO STRESS ACTIVITY

|                 |       |                                                   |
|-----------------|-------|---------------------------------------------------|
| <i>M60.2</i>    | 1.68  | M60.2                                             |
| <i>hsp-17</i>   | 1.66  | Heat Shock Protein                                |
| <i>his-10</i>   | 1.60  | HIStone                                           |
| <i>pqm-1</i>    | 1.53  | ParaQuat (Methylviologen) responsive              |
| <i>lea-1</i>    | 1.43  | Plant late embryo abundant (LEA) related          |
| <i>skr-3</i>    | 1.41  | SKp1 Related (ubiquitin ligase complex component) |
| <i>skr-3</i>    | 1.36  | SKp1 Related (ubiquitin ligase complex component) |
| <i>his-37</i>   | 1.31  | HIStone                                           |
| <i>catalase</i> | 1.41  | Y54G11A.13                                        |
| <i>ftn-1</i>    | 1.41  | FerriTiN                                          |
| <i>mtl-1</i>    | 1.27  | MeTaLlothionein                                   |
| <i>mtl-2</i>    | 1.27  | MeTaLlothionein                                   |
| <i>coq-3</i>    | 1.26  | COenzyme Q (ubiquinone) biosynthesis              |
| <i>sod-4</i>    | 1.20  | SOD (superoxide dismutase)                        |
| <i>gst-5</i>    | 1.20  | Glutathione S-Transferase                         |
| <i>mev-1</i>    | 1.16  | Succinate dehydrogenase cytochrome b chain        |
| <i>gst-4</i>    | 1.15  | Glutathione S-Transferase                         |
| <i>R05H10</i>   | 1.10  | Glutathione peroxidases                           |
| <i>gcs-1</i>    | -1.45 | Gamma GlutamylCysteine Synthetase                 |
| <i>daf-18</i>   | -1.47 | abnormal DAuer Formation                          |
| <i>mpk-1</i>    | -1.48 | MAP Kinase                                        |
| <i>mre-11</i>   | -1.49 | Human MRE11 protein like                          |
| <i>dnj-8</i>    | -1.5  | DNaJ domain (prokaryotic heat shock protein)      |
| <i>F23C8.9</i>  | -1.5  | F23C8.9                                           |
| <i>thn-1</i>    | -1.56 | Arabidopsis pathogenesis-related protein 5 like   |
| <i>F08F8.4</i>  | -1.77 | F08F8.4                                           |
| <i>gst-10</i>   | -2.03 | Glutathione S-Transferase                         |
| <i>clk-1</i>    | -1.17 | CLock (biological timing) abnormality             |
| <i>coq-1</i>    | -1.23 | COenzyme Q (ubiquinone) biosynthesis              |
| <i>coq-2</i>    | -1.31 | COenzyme Q (ubiquinone) biosynthesis              |

Microarray data showing significantly ( $p < 0.05$ ) changed genes in GO class representing response to stress from GYY4137-exposed (100  $\mu$ M) *C. elegans*.
