# Supplementary material
Source: PubMed Central journal article supplement (PMC4025568)
Supplement: Supp_Table3.pdf [file Supp_Table3.pdf]

SUPPLEMENTARY TABLE S3. PRIMER SEQUENCES

---

*ama-1*

Forward primer CCTACGATGTATCGAGGCAAA

Reverse primer CCTCCCTCCGGTGAATAATG

*pmp-3*

Forward primer GTTCCCGTGTTCACTCAT

Reverse primer ACACCGTCGAGAAGCTGTAGA

*mpst-1*

Forward primer CTTGTACCTGGCTGGACACA

Reverse primer CGCGCGGTATTGTTGGAATC

*mpst-2*

Forward primer AGTGCAAATTCCATTGTCACACC

Reverse primer CCTGGAATGTGCTCATCCGT

*mpst-3*

Forward primer GATGCTTGGAAAGCTGCTGG

Reverse primer CCAGTGAAGTGTGGTGTGGT

*mpst-4*

Forward primer TGTGATCAAGCTTTTGCCGC

Reverse primer AGTGAAGTGTGCTGTTGAGGT

*mpst-5*

Forward primer CAAACTTGCCCAAGGTGTCG

Reverse primer GACAACGGTGTCTCCGACTT

*mpst-6*

Forward primer GAAGTTTGTGCTGCCAAGGG

Reverse primer AGTCCGATTCCGCAACCAAT

*mpst-7*

Forward primer CTGTTGGGCAGTGGAAAGGAT

Reverse primer CTCTCAAACCGTCAGGTGCT

*cth-1*

Forward primer ATATCGCAGCCGTGGTACAG

Reverse primer AATGTCTGCGCCGAGAGAAA

*cth-2*

Forward primer TCGGAACTGCTGCTATCCAC

Reverse primer ACTTGGCAGTGTGCTGCGTC

*cbs-1a*

Forward primer GCTGGGGGATCAACAAAGGA

Reverse primer AGATGCAAGCGAAAGTCCGA

*cbs-1b*

Forward primer ACATGGTGTTCGCGTTGTTG

Reverse primer CCAGTGGCCTTTTTGAACTTGT

*cbs-2*

Forward primer CAGCTCCAGCTCCAGAAACA

Reverse primer CCATGATCCCTTCCGTCTCG

---
